# Supplementary material
Source: PubMed Central journal article supplement (PMC3488067)
Supplement: supp_M112.371591_Table_S1-S2.pdf [file supp_M112.371591_Table_S1-S2.pdf]

**Table S1. Yeast plasmids used in this study**

| Plasmid            | Vector; Insert                                                 | Source or reference |
|--------------------|----------------------------------------------------------------|---------------------|
| pATG9-3×GFP(306)   | pRS306; <i>ATG9-3×GFP</i>                                      | (1)                 |
| pCU-GFP-AUT7(416)  | pCU-GFP(416); <i>ATG8</i>                                      | (2)                 |
| pRFP-APE1(305)     | pRS305; <i>RFP-APE1</i>                                        | (3)                 |
| pCU-GFP-Atg32(416) | pRS416; <i>Atg32</i>                                           | (4)                 |
| pTL334             | pPHO5 <sup>prom</sup> (406); <i>GFP-myc-PH<sup>FAPP1</sup></i> | (5)                 |
| pZY054             | pCU(416); <i>3HA</i>                                           | This study          |
| pZY084             | pCU-3HA(416); <i>PIK1</i>                                      | This study          |
| pZY085             | pCU-3HA(405); <i>PIK1</i>                                      | This study          |
| pZY086             | pCU-RFP(405); <i>ATG8</i>                                      | This study          |
| pZY087             | pCU-GFP(416); <i>PIK1</i>                                      | This study          |
| pZY088             | pCU-GFP(416); <i>PIK1-11</i>                                   | This study          |
| pZY089             | pCU-GFP(416); <i>PIK1-83</i>                                   | This study          |
| pZY090             | pCU-GFP(416); <i>PIK1-104</i>                                  | This study          |
| pZY094             | pFA6a-KAN1; <i>PIK1-11</i>                                     | This study          |
| pZY095             | pFA6a-KAN1; <i>PIK1-83</i>                                     | This study          |
| pZY096             | pFA6a-KAN1; <i>PIK1-104</i>                                    | This study          |
| pZY097             | pFA6a-TRP1; <i>PIK1-11</i>                                     | This study          |
| pZY098             | pFA6a-TRP1; <i>PIK1-83</i>                                     | This study          |
| pZY099             | pFA6a-TRP1; <i>PIK1-104</i>                                    | This study          |

**Table S2. Yeast strains used in this study**

| Strain             | Genotype                                                                                | Source or reference |
|--------------------|-----------------------------------------------------------------------------------------|---------------------|
| BY4742             | <i>MATa leu2-Δ0 his3-Δ1 lys2-Δ0 ura3-Δ0</i>                                             | ResGen/Invitrogen   |
| <i>frq1-1</i>      | BY4742 <i>frq1-1</i>                                                                    | This study          |
| JGY169             | SEY6210 <i>GFP-ATG8::LEU2 vam3<sup>ts</sup>::TRP1</i>                                   | (6)                 |
| JK9-3da            | <i>MATa leu2-3,112 ura3-52 rme1, trp1 his4</i><br><i>GAL HMLa</i>                       | (7)                 |
| KWY20              | SEY6210 <i>pho8Δ::TRP1 pho13Δ::LEU2</i><br>pRS406- <i>ADH1-COX4-pho8Δ60</i>             | (8)                 |
| KWY22              | SEY6210 <i>pho8Δ::TRP1 pho13Δ::LEU2</i><br>pRS406- <i>ADH1-COX4-pho8Δ60 atg32Δ::KAN</i> | (8)                 |
| KWY79              | KWY20, <i>pik1-104::KAN</i>                                                             | This study          |
| <i>SEC7-6DsRed</i> | JK9-3da <i>SEC7-6xDsRed::TRP1</i>                                                       | Benjamin Glick      |
| TKYM107            | BY4742, <i>OM45-GFP::HIS3</i>                                                           | (8)                 |
| TKYM137            | BY4742, <i>OM45-GFP::HIS3 atg32Δ::KAN</i>                                               | (8)                 |
| KWY80              | <i>stt4-4 OM45-GFP::HIS3</i>                                                            | This study          |
| KWY81              | <i>pik1-104 OM45-GFP::HIS3</i>                                                          | This study          |
| KWY82              | <i>mss4-103 OM45-GFP::HIS3</i>                                                          | This study          |
| KWY83              | <i>mss4-103 pho8Δ60::URA3 pho13Δ::LEU2</i>                                              | This study          |
| KWY84              | BY4742 <i>pho8Δ::HIS3 pho13Δ::LEU2</i><br>pRS406- <i>ADH1-COX4-pho8Δ60</i>              | This study          |
| KWY85              | <i>stt4-4 pho8Δ::HIS3 pho13Δ::LEU2</i><br>pRS406- <i>ADH1-COX4-pho8Δ60</i>              | This study          |

|                 |                                                     |            |
|-----------------|-----------------------------------------------------|------------|
| KWY86           | <i>mss4-103 pho8Δ::HIS3 pho13Δ::LEU2</i>            |            |
|                 | <i>pRS406-ADHI-COX4-pho8Δ60</i>                     | This study |
| KWY87           | KWY83 <i>atg32Δ::KAN</i>                            | This study |
| <i>pik1-104</i> | BY4741 <i>pik1-104</i>                              | This study |
| <i>sec14-3</i>  | BY4741 <i>sec14-3</i>                               | This study |
| SEY6210         | <i>MATα ura3-52 leu2-3,112 his3-Δ200</i>            |            |
|                 | <i>trp1-Δ901 lys2-801 suc2-Δ9 mel GAL</i>           | (9)        |
| <i>stt4-4</i>   | BY4741 <i>stt4-4</i>                                | This study |
| TYY127          | YTS158 <i>atg1Δ::URA3</i>                           | (10)       |
| YES47           | YPH499 <i>pik1-11::TRP1</i>                         | (11)       |
| YES102          | YPH499 <i>pik1-83::TRP1</i>                         | (11)       |
| YPH499          | <i>MATα ade2-101<sup>oc</sup> his3-Δ200 leu2-Δ1</i> |            |
|                 | <i>lys2-801<sup>am</sup> trp1-Δ1 ura3-52</i>        | (12)       |
| YTS158          | BY4742 <i>pho8Δ60::HIS3 pho13Δ::LEU2</i>            | (10)       |
| ZFY070          | SEY6210 <i>atg1Δ::URA3 ATG27-GFP::HIS3</i>          |            |
|                 | <i>RFP-APE1::LEU2</i>                               | This study |
| ZFY073          | SEY6210 <i>GFP-ATG8::LEU2</i>                       | This study |
| ZFY202          | W303-1B <i>pho13Δ pho8Δ60::HIS3</i>                 | (13)       |
| ZFY270          | BY4742 <i>atg1Δ::KAN ATG9-3×GFP::URA3</i>           |            |
|                 | <i>RFP-APE1::LEU2</i>                               | This study |
| ZFY273          | <i>pik1-104 atg1Δ::KAN ATG9-3×GFP::URA3</i>         |            |
|                 | <i>RFP-APE1::LEU2</i>                               | This study |

|        |                                              |            |
|--------|----------------------------------------------|------------|
| ZFY276 | <i>frq1-1 atg1Δ::KAN ATG9-3×GFP::URA3</i>    |            |
|        | <i>RFP-APE1::LEU2</i>                        | This study |
| ZFY280 | <i>frq1-1 pho8Δ60::URA3 pho13Δ::LEU2</i>     | This study |
| ZFY281 | <i>pik1-104 pho8Δ60::URA3 pho13Δ::LEU2</i>   | This study |
| ZFY282 | <i>stt4-4 pho8Δ60::URA3 pho13Δ::LEU2</i>     | This study |
| ZFY283 | YPH499 <i>pho8Δ60::HIS3 pho13Δ::LEU2</i>     | This study |
| ZFY284 | <i>pik1-11 pho8Δ60::HIS3 pho13Δ::LEU2</i>    | This study |
| ZFY285 | <i>frq1-1 Cu3HA-PIK1::LEU2</i>               | This study |
| ZFY286 | <i>pik1-11 Cu3HA-PIK1::LEU2</i>              | This study |
| ZFY287 | <i>pik1-83 Cu3HA-PIK1::LEU2</i>              | This study |
| ZFY288 | <i>pik1-104 Cu3HA-PIK1::LEU2</i>             | This study |
| ZFY290 | <i>sec14-3 Cu3HA-PIK1::LEU2</i>              | This study |
| ZFY293 | ZFY202 <i>pik1-83::TRP1</i>                  | This study |
| ZFY299 | SEY6210 <i>atg1Δ::URA3 ATG27-GFP::HIS3</i>   |            |
|        | <i>RFP-APE1::LEU2 pik1-11::TRP1</i>          | This study |
| ZFY301 | SEY6210 <i>atg1Δ::URA3 ATG27-GFP::HIS3</i>   |            |
|        | <i>RFP-APE1::LEU2 pik1-104::TRP1</i>         | This study |
| ZFY305 | SEY6210 <i>GFP-ATG8::LEU2 pik1-104::TRP1</i> | This study |
| ZFY306 | JGY169 <i>pik1-104::KAN</i>                  | This study |
| ZFY326 | <i>SEC7-6×DsRed::TRP1 ATG9-3×GFP::URA3</i>   | This study |
| ZFY328 | <i>SEC7-6×DsRed::TRP1 ATG9-3×GFP::URA3</i>   |            |
|        | <i>pik1-104::KAN</i>                         | This study |

## Supplemental references

1. Monastyrska, I., He, C., Geng, J., Hoppe, A. D., Li, Z., and Klionsky, D. J. (2008) Arp2 links autophagic machinery with the actin cytoskeleton. *Mol. Biol. Cell* **19**, 1962-1975
2. Kim, J., Huang, W.-P., and Klionsky, D. J. (2001) Membrane recruitment of Aut7p in the autophagy and cytoplasm to vacuole targeting pathways requires Aut1p, Aut2p, and the autophagy conjugation complex. *J. Cell Biol.* **152**, 51-64
3. Stromhaug, P. E., Reggiori, F., Guan, J., Wang, C.-W., and Klionsky, D. J. (2004) Atg21 is a phosphoinositide binding protein required for efficient lipidation and localization of Atg8 during uptake of aminopeptidase I by selective autophagy. *Mol. Biol. Cell* **15**, 3553-3566
4. Kanki, T., Wang, K., Cao, Y., Baba, M., and Klionsky, D. J. (2009) Atg32 is a mitochondrial protein that confers selectivity during mitophagy. *Dev. Cell* **17**, 98-109
5. Roy, A., and Levine, T. P. (2004) Multiple pools of phosphatidylinositol 4-phosphate detected using the pleckstrin homology domain of Osh2p. *J. Biol. Chem.* **279**, 44683-44689
6. Geng, J., Nair, U., Yasumura-Yorimitsu, K., and Klionsky, D. J. (2010) Post-Golgi Sec proteins are required for autophagy in *Saccharomyces cerevisiae*. *Mol. Biol. Cell* **21**, 2257-2269
7. Heitman, J., Movva, N. R., Hiestand, P. C., and Hall, M. N. (1991) FK 506-binding protein proline rotamase is a target for the immunosuppressive agent FK 506 in *Saccharomyces cerevisiae*. *Proc. Natl. Acad. Sci. U.S.A.* **88**, 1948-1952
8. Kanki, T., Wang, K., Baba, M., Bartholomew, C. R., Lynch-Day, M. A., Du, Z., Geng, J., Mao, K., Yang, Z., Yen, W.-L., and Klionsky, D. J. (2009) A genomic screen for yeast mutants defective in selective mitochondria autophagy. *Mol. Biol. Cell* **20**, 4730-4738
9. Robinson, J. S., Klionsky, D. J., Banta, L. M., and Emr, S. D. (1988) Protein sorting in *Saccharomyces cerevisiae*: isolation of mutants defective in the delivery and processing of multiple vacuolar hydrolases. *Mol. Cell. Biol.* **8**, 4936-4948
10. He, C., Song, H., Yorimitsu, T., Monastyrska, I., Yen, W.-L., Legakis, J. E., and Klionsky, D. J. (2006) Recruitment of Atg9 to the preautophagosomal structure by Atg11 is essential for selective autophagy in budding yeast. *J. Cell Biol.* **175**, 925-935

11. Hendricks, K. B., Wang, B. Q., Schnieders, E. A., and Thorner, J. (1999) Yeast homologue of neuronal frequenin is a regulator of phosphatidylinositol-4-OH kinase. *Nat. Cell Biol.* **1**, 234-241
12. Sikorski, R. S., and Hieter, P. (1989) A system of shuttle vectors and yeast host strains designed for efficient manipulation of DNA in *Saccharomyces cerevisiae*. *Genetics* **122**, 19-27
13. Yang, Z., Geng, J., Yen, W.-L., Wang, K., and Klionsky, D. J. (2010) Positive or negative roles of different cyclin-dependent kinase Pho85-cyclin complexes orchestrate induction of autophagy in *Saccharomyces cerevisiae*. *Mol. Cell* **38**, 250-264
